# Supplementary material
Source: ML conference proceedings conference paper supplement (https://openreview.net/forum?id=RwASmRpLp-)
Supplement: supplementary_material [file attachment]

# Appendix

## 1 NORESQA Architecture

NORESQA’s architecture comprises of three key components: a *feature-extraction* block, a *temporal-learning* block and *task-specific* heads.

### Feature-Extraction Block.

We use the Inception architecture in the feature extraction block. It consists of 4-block Inception modules: each module consisting of 64 convolutional filters - 24 1x1 filters, 32 3x3 filters, and 8 5x5 filters. These filters are concatenated and finally passed through a 1x4 maxpool block, preserving the temporal dimension. This is repeated for each of the 4 inception blocks. The final output dimensions of the model is  $B \times 64 \times T \times 2$ , where  $B$  is the batch size, and  $T$  is the number of frames. ReLU is used as the activation function after each layer.

### Temporal Learning Block.

We use temporal convolutional networks (TCNs) in the temporal learning block. The network consists of 4 temporal blocks. Each block consists of 2 convolutional layers with a kernel size of 1x3, with each layer consisting of 32, 64, 64 and 128 channels for each of the 4 blocks respectively. After the convolutional layers, each layer uses weight normalization which is a reparameterization trick that decouples the magnitude of a weight tensor from its direction. The outputs are then passed to ReLU as an activation function, and finally to dropout having a value of 0.2. The convolutional layers in each block consist of dilated convolutions with dilation factors of 2, 4, 8 and 16 for each of the 4 blocks. Use of dilated convolutions increases the effective history of our model. The initial weights of this network are chosen from the normal distribution  $\mathcal{N}(0, 1e^{-2})$ .

The parameters for both these blocks (feature-extraction and temporal-learning) are shared between the two inputs to our model. The embeddings for each input are concatenated (along the channel dimension), and are then passed next to the task-specific heads. The input to this model is  $B \times T \times 128$ , and the output is also  $B \times T \times 128$ , since TCNs can maintain the same length of the signal.

### Task Specific Heads.

Each of the two tasks (*preference-task* and *quantification-task*) each has a separate head. Their architecture is described next:

*Preference Task:* The output of the preference task is a frame-level prediction of which input is cleaner. This head consists of 3 convolutional layers, each consisting of 32, 8 and 2 channels respectively. The kernel size for each layer is 1x5, with each layer also having BatchNorm and dropout (0.2). The input to this model is  $B \times T \times 256$  (after concatenating along the channel dimension of the two inputs) and the output is  $B \times T \times 2$  with a framewise prediction of which input is cleaner.

*Quantification Task:* Refer to Sec 3.3 (main paper). The objective of the quantification task is to quantify the framewise quality difference between the two inputs. Here we formulate this as a classification problem, where we divide the whole range of SNR ( $\Delta snr_{max}$ ) and SI-SDR ( $\Delta sdr_{max}$ ) into  $K$  equal intervals. The output of this head is a probability distribution over all  $K$  classes. Similar to the Preference task, this network also produces frame-level distributions. For both objectives (SNR and SI-SDR), we take  $K = 40$ . This head consists of 3 convolutional layers, each consisting of 64, 50 and 40 channels respectively. The kernel size for each layer is 1x5, with each layer also having BatchNorm and dropout (0.2). The input to this model is again  $B \times T \times 256$  (after concatenating along the channel dimension of the two inputs) and the outputs are  $B \times T \times 40$  for both SI-SDR and SNR for a framewise prediction of relative quality.

## 2 Experimental setup

**Dataset.** For the training and validation set, we choose the clean audio recordings from the DNS Challenge. The noise perturbations are sampled from the FSDK50 dataset that consists of over 51k audio samples encompassing around 100 hours of audio manually labelled using 200 classes drawn

from the Audioset ontology. As additional examples of distortions, we also use Clipping distortion, and Frequency masking as very common examples of distortions found in audio processing tasks. All data is divided into 90% train and 10% validation so that there is no overlap of train and validation data.

For the test set, we use the TIMIT dataset for the clean recordings. The noise perturbations are sampled from the ESC-50 dataset that consists of 2000 labeled recordings equally balanced between 50 classes (exactly 40 clips per class). We also use Gaussian noise and Mu law compression as two examples of unseen test distortions.

The training and testing pairs are created by adding the same type/category of noise to both recordings, but at two *different* noise levels to two *different* clean recordings. We design a simulation environment where we sample the clean recordings and noisy recordings from their respective datasets, and create the degraded recordings at differences levels of noise.

We also include reverberations in our audio recordings to make them more realistic and help the model generalize better. We sample impulse responses from the DNS Challenge dataset and convolve with the noisy recordings before input to the model. We use the “medium-room” and “small-room” RIRs, where the length and width of the room are sampled from 1 to 30m.

### 3 Objective Evaluations

#### 3.1 In-variance to language

Fig 1 shows our metric’s outputs with increasing SNR and SI-SDR difference for an unseen set of clean recordings that were randomly chosen from various languages including Mandarin, French - Arabic - Turkish - Spanish, Indian languages - Bengali, Gujarati, Hindi and Marathi, and noise recordings from ESC-50. Note that, the model itself was trained on English speech and we are testing with different languages. We see that the model performs fairly well for these unseen languages.

We studied robustness with respect to language by using non-matching references as well. In this case our test recording is always randomly selected from the English TIMIT dataset, and our reference recording is randomly chosen from any of the multi-language datasets (Fig 2). We observe that the general trend of the model is quite similar to Fig 2(a) and (b), (from the main paper, that showed the variation with English) which suggests that the model is invariant to language, and only considers acoustic differences to assess relative quality. Overall, these evaluations show that the trained model is not only robust to the language of test recording but can also compare quality of two speech signals with different languages.

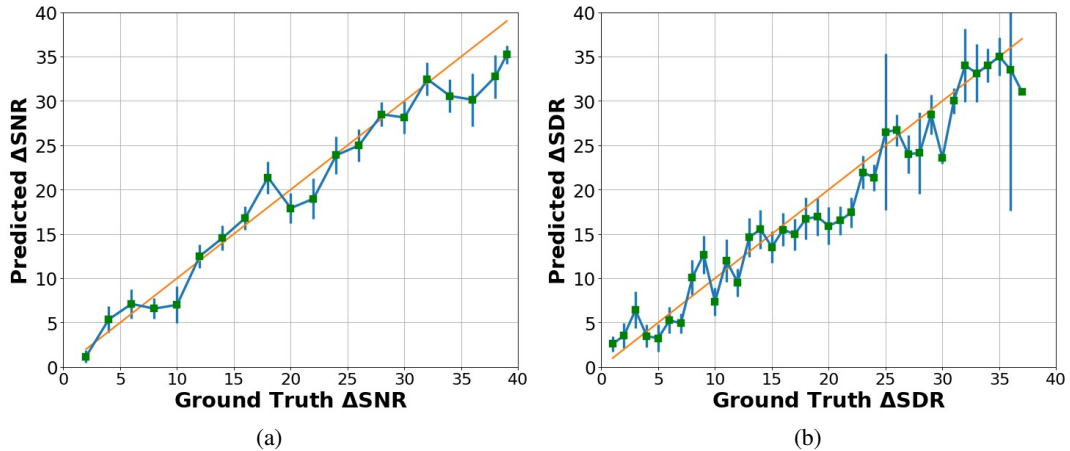

Figure 1: Variation of our models output with increasing (a) SNR and (b) SI-SDR using *test and reference* recordings randomly chosen from Mandarin, French, Arabic, Turkish, Spanish, Bengali, Gujarati, Hindi and Marathi.

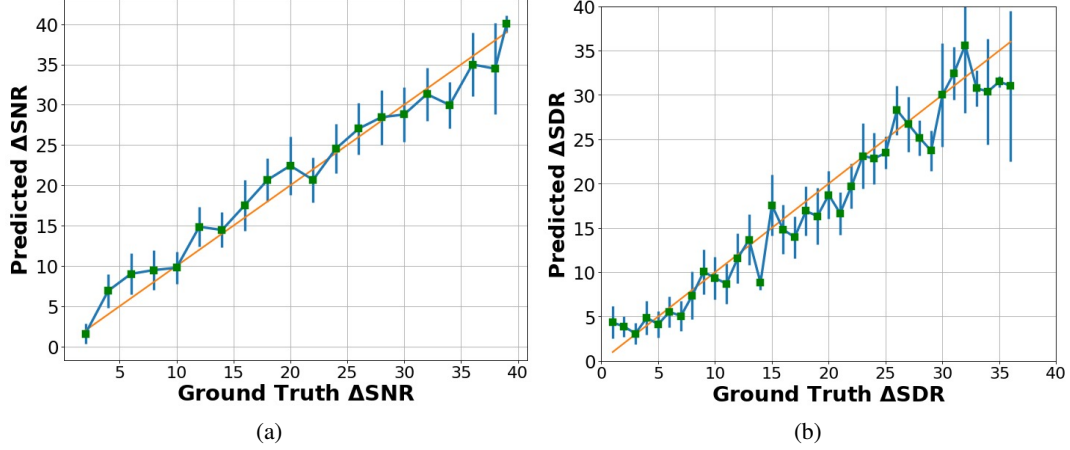

Figure 2: Variation of our models output with increasing (a) SNR and (b) SI-SDR using *test* speech from English (TIMIT), and *reference* recordings from Mandarin, French, Arabic, Turkish, Spanish, Bengali, Gujarati, Hindi and Marathi.

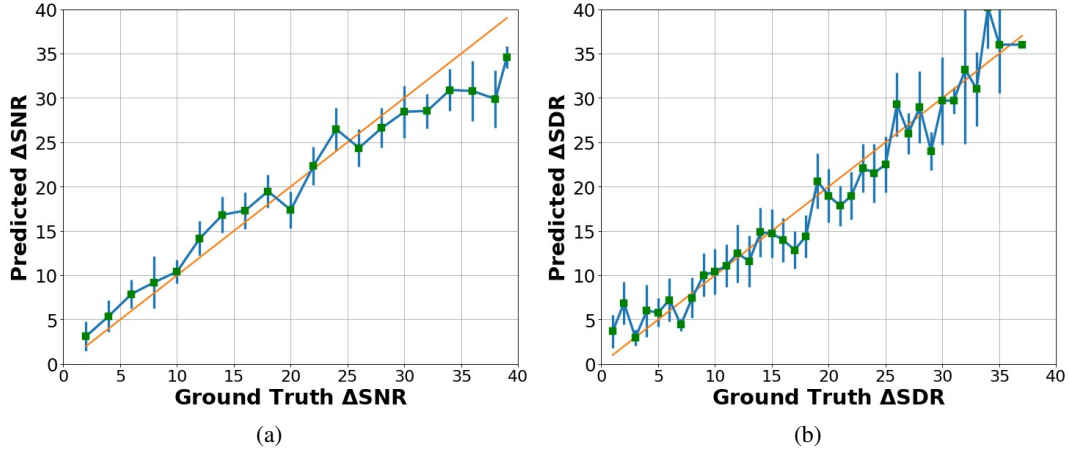

Figure 3: Variation of our models output with increasing (a) SNR and (b) SI-SDR using unseen clean *male* speech from the DAPS dataset.

### 81 3.2 In-variance to gender

82 We now evaluate how NORESQA behaves with respect to speaker’s gender. Once again we try  
 83 to disentangle behaviour w.r.t to speaker’s gender through two experiments. First, we see how the  
 84 trained models behave for each gender, male and female. We test the models in male-only speaker  
 85 condition (test and references are all male speeches) as well as in female-only speaker condition.  
 86 Fig 3 shows the trends for male and 4 shows it for female. We note that the model works well in  
 87 both cases.

88 Second, we evaluate how stable NORESQA is when the gender of the test recording *does not* match  
 89 the reference, i.e., test recording is male speech, and reference recording is female speech and vice-  
 90 versa (Fig 5). Once again, we observe that mis-matching speaker’s gender in test and references does  
 91 not adversely affect model’s behaviour. Overall, based on these evaluation, we conclude that the  
 92 model is invariant to gender of the speaker and is primarily learning quality related characteristics.

### 93 3.3 Commutativity: $\mathcal{N}(x_{test}, x_{ref}) = \mathcal{N}(x_{ref}, x_{test})$

94 We empirically evaluate the model to check if it satisfies the commutative property i.e.,  
 95  $\mathcal{N}(x_{test}, x_{ref}) = \mathcal{N}(x_{ref}, x_{test})$

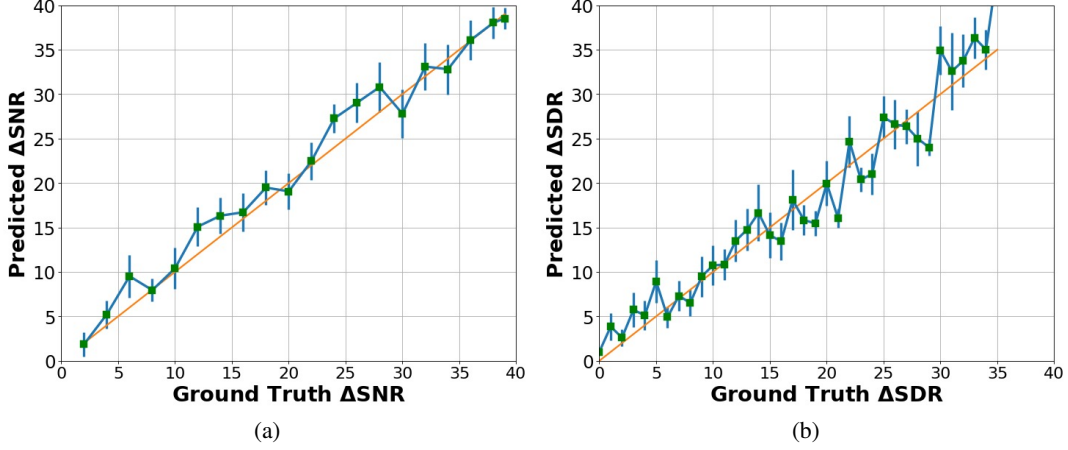

Figure 4: Variation of our models output with increasing (a) SNR and (b) SI-SDR using clean *female* speech from the DAPS dataset.

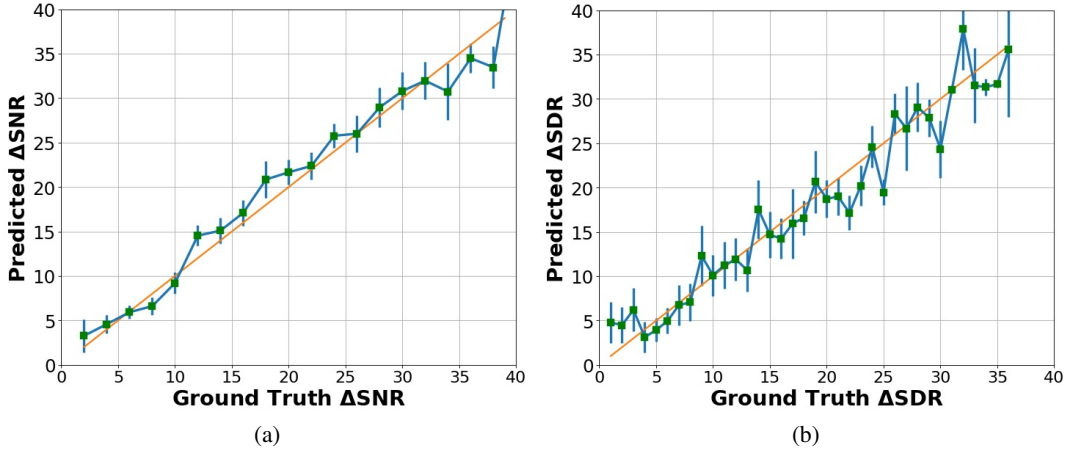

Figure 5: Variation of our models output with increasing (a) SNR and (b) SI-SDR under mismatched gender conditions (i.e., test recording is male speech, and reference recording is female speech and vice-versa)

96 To evaluate the *preference-task*, we check the overall recording-wise predictions of both cases (i.e.,  
 97  $\mathcal{N}(x_{test}, x_{ref})$  and  $\mathcal{N}(x_{ref}, x_{test})$  and see how well does the quality preference order swap when  
 98 swapping the order of the inputs. We calculate accuracy by counting the number of times the  
 99 preference order correctly gets swapped, and divide it by the total number of recordings. Our metric  
 100 gets an accuracy of 98.3% that empirically shows that it obeys the commutative property.

101 To evaluate the *quantification task* (Fig 6), we compute the predictions of both cases (i.e.,  $d_1 =$   
 102  $\mathcal{N}(x_{test}, x_{ref})$  and  $d_2 = \mathcal{N}(x_{ref}, x_{test})$ ). We then plot the distribution  $abs(d_1 - d_2)$  for 1000  
 103 different pairs of recordings. We observe that the distribution is centered around 0dB which  
 104 empirically suggests that it obeys the commutative property.

105 Overall, our model learns these two desirable properties without any specific training, and this  
 106 suggests the usefulness of our framework for audio quality judgment.

### 107 3.4 Indiscernibility of Identicals: $\mathcal{N}(x_{test}, x_{test})$

108 Here, we show the output of our model when passed the same inputs (Refer to Sec 5.1 in the  
 109 main paper). Ideally, the model should predict no quality difference when passed the same inputs.  
 110 However, since our learning mechanism does not explicitly enforce the framework to have this  
 111 property, so small errors are expected. For a fair comparison, we calculate the recording-level

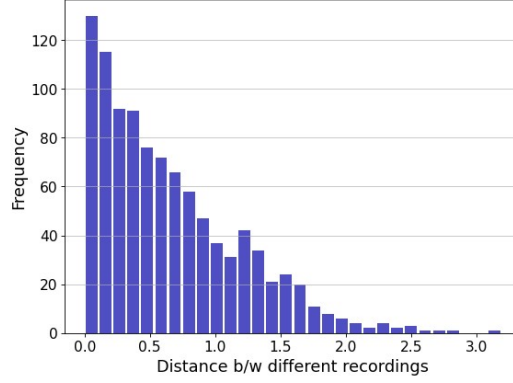

Figure 6: **Commutative Property:** Histogram plot of  $\text{abs}(\mathcal{N}(x_{test}, x_{ref}) - \mathcal{N}(x_{ref}, x_{test}))$

112 predictions from our model. Fig 7(a) shows the probability outputs on the *preference-task*. The  
 113 outputs are close to 0.5 that suggests that the model is unable to confidently identify which output  
 114 is cleaner. Fig 7(b) shows the output from the *quantification-task*. The distribution of the scores is  
 115 centered around zero that suggests that the model correctly predicts that the two same inputs have  
 116 similar quality levels, hence the near-zero quality difference.

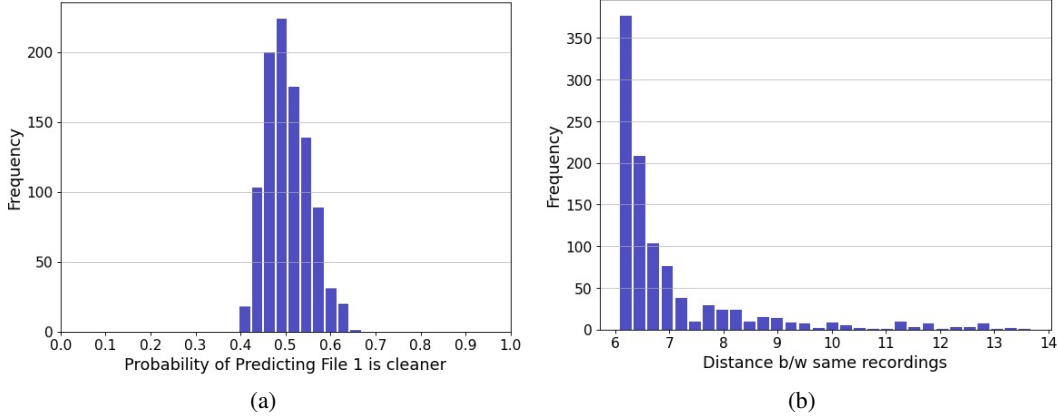

Figure 7: **Indiscernibility of Identicals:** (a) Evaluating our metric’s performance on the *preference-task* and (b) *quantification-task* for the *same* inputs

### 117 3.5 Framewise detection

118 We also analyse the framewise performance of our model (Fig 8), using the same test bench that  
 119 we created earlier, that consists of different recordings at various noise levels where each recording  
 120 is 3 seconds. We concatenate different recordings together in *decreasing* levels of noise (i.e from  
 121 high noise to low noise equally spaced from -10dB to +30dB) which becomes the test input to  
 122 our model. Equivalently, the reference input to our model consists of a random concatenation  
 123 of NMRs at +30dB. We observe that the framewise output of task 1 (preference-task) is almost  
 124 97% accurate in the preference task of predicting which frame is cleaner between the two input  
 125 recordings, which suggests that it learns this quite well. We also compare the framewise outputs from  
 126 task 2 (quantitative-task) that predicts their relative quality difference. We find that the framewise  
 127 predictions are not monotonic but still follow the general trend. This is expected, since we always  
 128 optimize on a recording level, and not on a frame level. This findings suggest that our metric can  
 129 detect and quantify which frames are degraded in quality between the inputs.

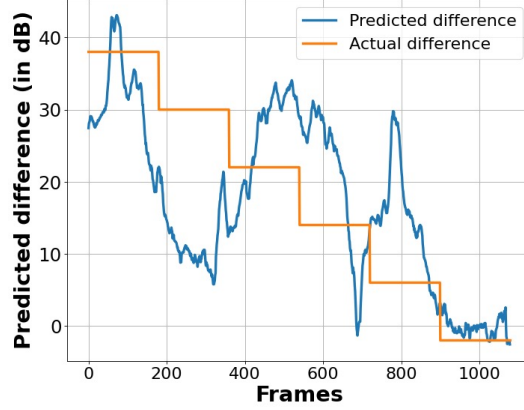

Figure 8: **Framewise Predictions:** Evaluating the framewise predictions of our model using a test recording that has decreasing levels of noise (from -10dB to +30dB) and the reference set consists of NMRs at +30dB.

## 4 Subjective Evaluation Datasets

Refer to Sec 5.2 in the main paper. We evaluate our framework subjectively on two tasks: (i) Correlation with MOS across 8 existing datasets, and (ii) 2AFC accuracy, where we show the performance of our metric on triplet comparison questions from 4 different datasets. MOS checks for aggregated ordering, scale and consistency, whereas 2AFC checks for exact ordering of similarity at per sample basis. Most of the datasets lie within the range of -15dB to 60dB SNR and -15dB to 25dB SI-SDR, which also roughly matches our chosen training intervals.

The following are the datasets that we used for evaluation:

1. *VoCo*: This dataset is based on comparing 6 different *word synthesis and insertion* algorithms. The MOS tests were asked to rate which algorithm could synthesize a new word such that it blends seamlessly in the context of the existing narration. This consists of non-sample aligned pairs of recordings.
2. *Dereverberation*: This dataset is based on evaluating improvements across 5 deep-learning based *speech enhancement* models including BLSTM, Wavenet, StarGAN-VC etc. MOS tests were done to evaluate which algorithm was rated the highest by subjects from Amazon Mechanical Turk (AMT). They obtained more than 100 ratings per condition.
3. *PEASS*: The dataset contains separated sources and specifically defined anchor signals to assess audio *source separation* performance across 4 metrics: *global quality*, *preservation of target source*, *suppression of other sources*, and *absence of additional artifacts*. Here, we only look at *global quality*. It consists of scores from 20 subjects over a set of 80 sounds.
4. *Voice Conversion (VC)*: This objective of this dataset is to compare the performance on speaker (voice) conversion. It consists of two tasks: (i) parallel (*HUB*) and (ii) non-parallel data (*SPO*). Here we only consider *HUB*. The dataset consists of 4 source and 4 target speakers, where each speaker utters the same sentence set consisting of around 80 sentences.
5. *Noizeus*: The dataset was developed to encourage comparison of non-deep learning based *speech enhancement* algorithms, and consists of 30 IEEE sentences from 3 male and female speakers. The recordings are corrupted by 8 real-world noises, where the noises are taken from the AURORA database. The evaluation is done across 3 metrics: *SIG*-speech signal alone; *BAK*-background noise; and *OVRL*-overall quality. Here, we only look at *OVRL*.
6. *TCD-VoIP*: This dataset was developed to help assess degradations that can occur in VoIP (Voice over IP calls). It contains speech samples with a range of common VoIP degradations background noise, echo, chop (packet loss), clipping etc., and the corresponding set of subjective scores from 24 listeners.
7. *HiFi-GAN*: This dataset is based on evaluating the improvement across 10 deep-learning based *speech enhancement* models including BLSTM, Wavenet, MetricGAN, SpecGAN etc. MOS tests were done to evaluate which algorithm was rated the highest by subjects from Amazon

166 Mechanical Turk (AMT), with each method receiving around 14k ratings. Further, it also  
 167 consists of a 2AFC preference dataset consisting of around 1200 triplets, where each triplet  
 168 received around 900 judgment ratings.

169 8. *FFTnet*: This dataset is based on evaluating the performance of 5 *speech synthesis* algorithms  
 170 across 2 male and female speakers. It introduces artifacts specific to synthesis and are not  
 171 sample-aligned due to phase change. Further, it also consists of a 2AFC preference dataset  
 172 consisting of around 2050 triplets, where each triplet received around 480 ratings.

173 9. *Bandwidth Expansion*: This dataset consists of subjective tests for 3 different *bandwidth*  
 174 *expansion* algorithms, aiming at increasing sample rate by filling in the missing high-frequency  
 175 information. These audio samples consist of very subtle high-frequency differences. Further,  
 176 it also consists of a 2AFC preference dataset consisting of around 1020 triplets, where each  
 177 triplet received around 400 judgments.

178 10. *Simulated*: This dataset consists of 2AFC preference triplets, totalling to 1210. These are all  
 179 based on adding *common-realistic degradations* like background noises, speech distortions like  
 180 clipping and other miscellaneous types of degradation’s like compression and EQ.

## 181 5 Ablations

182 In this section, we evaluate the influence of different components of our framework.

### 183 5.1 Relative vs Absolute Quantification Task

184 One key aspect of NORESQA is that it tries to model relative quality differences rather absolute  
 185 quality measures in terms of SNR and SI-SDR. We discussed motivations and intuitive reasons for  
 186 it in the main paper. We empirically study the relative vs absolute modeling of the quality measures  
 187 here. We compare our framework to models that are trained to predict SNR and SI-SDR directly.

188 For the absolute quality prediction models, we consider two cases (i) [*Single Input Absolute*  
 189 *Quantification*]: a single input model that takes a test recording and directly predicts the absolute  
 190 quality measure, SNR and SI-SDR. It resembles the conventional formulation of a non-intrusive  
 191 metric, and (ii) [*Two Input Absolute Quantification*]: a pairwise model that takes a test recording  
 192 and a non-matching clean reference and predicts the absolute score. This is oriented towards our  
 193 NORESQA framework but instead of learning relative differences it tries to learn absolute quality  
 194 measures.

195 Results are shown in Table 1. We observe that our *relative* quality prediction model NORESQA  
 196 performs the best by a considerable margin. This empirically corroborate our hypothesis that  
 197 learning to model relative differences is much better than absolute measures. Their correlations  
 198 with MOS turns out to be much better than “absolute methods”. Moreover, we also observe that  
 199 providing *any* (even a non-matched) clean reference to the model improves the performance over  
 200 the *Single* case even for absolute quantification tasks. This demonstrates the inherent challenge of  
 201 the conventional formulation of the non-intrusive metric that does not provide any reference. This  
 202 highlights the usefulness of two features of our metric: (i) predicting relative quality scores, and (ii)  
 203 providing non-matching references.

| Name     | Type       | VoCo             |                  | Dereverb         |                  | HiFi-GAN         |                  | FFTnet           |                  |
|----------|------------|------------------|------------------|------------------|------------------|------------------|------------------|------------------|------------------|
|          |            | PC               | SC               | PC               | SC               | PC               | SC               | PC               | SC               |
| Absolute | Sing. Inp. | 0.32             | 0.31             | 0.19             | 0.17             | 0.19             | 0.30             | 0.16             | 0.15             |
|          | Two Inp.   | 0.41±0.15        | 0.35±0.03        | 0.26±0.08        | 0.27±0.01        | 0.42±0.07        | 0.45±0.06        | 0.17±0.01        | 0.09±0.01        |
| NORESQA  |            | <b>0.85±0.01</b> | <b>0.68±0.03</b> | <b>0.66±0.02</b> | <b>0.67±0.02</b> | <b>0.68±0.01</b> | <b>0.78±0.01</b> | <b>0.33±0.01</b> | <b>0.44±0.01</b> |

Table 1: **Ablations (1)**: Understanding the influence of predicting quality measures (single and pairwise) with our NORESQA using *Global-Fixed*<sub>100</sub> strategy. MOS Correlations: Spearman (SC), Pearson (PC). ↑ is better.

### 204 5.2 Multi-objective Learning of Quantification Task

205 To evaluate the impact of the multi-objective optimization (i.e., optimizing over both SI-SDR  
 206 and SNR) for the quantification task on correlation to subjective ratings, we compare our trained

metric: (i) only using the SNR head; (ii) only using the SI-SDR head; and (iii) after combining both SNR and SI-SDR heads. Results are shown in Table 2. For simplicity, we only look at the *Unpaired-Global-Fixed*<sub>100</sub> strategy, which is evaluating a test recording using 100 clean NMRs randomly chosen from the DAPS dataset. We observe that using either head alone performs worse than using both together, which suggests that using a multi-objective optimization helps learn a better general representation.

| Type    | Name           | VoCo        |             | Dereverb    |             | HiFi-GAN    |             | FFTnet      |             |
|---------|----------------|-------------|-------------|-------------|-------------|-------------|-------------|-------------|-------------|
|         |                | PC          | SC          | PC          | SC          | PC          | SC          | PC          | SC          |
| NORESQA | SNR only       | 0.43        | 0.39        | 0.39        | 0.38        | 0.49        | 0.42        | 0.2         | 0.1         |
|         | SI-SDR only    | 0.6         | 0.48        | 0.48        | 0.49        | 0.54        | 0.65        | 0.25        | 0.28        |
|         | SNR and SI-SDR | <b>0.85</b> | <b>0.68</b> | <b>0.66</b> | <b>0.67</b> | <b>0.68</b> | <b>0.78</b> | <b>0.33</b> | <b>0.44</b> |

Table 2: **Ablations (2):** Understanding the influence of using (multi-objective) SI-SDR and SNR for Task 2 using *Global-Fixed*<sub>100</sub> strategy. MOS Correlations: Spearman (SC), Pearson (PC). ↑ is better.

### 5.3 Number of NMRs

Here we report the MOS correlation scores obtained when considering a set of 1, 10 and 100 NMRs for each test recording. This is shown for all 3 unpaired strategies described in Sec 5.2 (of the main paper) - *Unpaired*, *Unpaired-Local-Fixed*, and *Unpaired-Global-Fixed*. Results are shown in Table 3. We observe that averaging the scores over a larger set of NMRs reduces the standard deviation in the scores which leads to more stable predictions. We also observe that PC values are more consistent and stable over many iterations, and have a lower standard deviation than SC values. Since SC measures monotonic relationships, it can easily overfit to a complex function, leading to a higher standard deviation per iteration. However, since PC maps linear relationships, it is more stable. Finally, we observe no significant difference between the scores from *Unpaired-Local-fixed* and *Unpaired-Global-fixed* which suggests that our metric works equally well for scenarios where we take any random set of clean recordings as NMRs.

| Type          | Category           | VoCo             |                  | Dereverb         |                  | HiFi-GAN         |                  | FFTnet           |                  |
|---------------|--------------------|------------------|------------------|------------------|------------------|------------------|------------------|------------------|------------------|
|               |                    | PC               | SC               | PC               | SC               | PC               | SC               | PC               | SC               |
| Unpaired      | NMR <sub>1</sub>   | 0.76±0.1         | 0.27±0.2         | 0.57±0.03        | 0.62±0.04        | 0.63±0.01        | 0.70±0.02        | 0.43±0.10        | 0.45±0.11        |
|               | NMR <sub>10</sub>  | 0.87±0.01        | 0.43±0.07        | 0.64±0.01        | 0.73±0.03        | 0.63±0.01        | 0.70±0.01        | 0.45±0.03        | 0.48±0.06        |
|               | NMR <sub>100</sub> | 0.88±0.01        | 0.41±0.06        | 0.63±0.01        | 0.75±0.02        | 0.63±0.01        | 0.71±0.01        | 0.46±0.01        | 0.51±0.02        |
| +Local-Fixed  | NMR <sub>1</sub>   | 0.65±0.23        | 0.40±0.23        | 0.53±0.10        | 0.57±0.15        | 0.56±0.08        | 0.64±0.08        | 0.38±0.10        | 0.31±0.13        |
|               | NMR <sub>10</sub>  | 0.79±0.1         | 0.44±0.2         | 0.61±0.05        | 0.69±0.05        | 0.61±0.02        | 0.67±0.03        | <b>0.48±0.03</b> | 0.50±0.04        |
|               | NMR <sub>100</sub> | <b>0.89±0.01</b> | 0.44±0.06        | 0.63±0.01        | <b>0.75±0.01</b> | 0.61±0.01        | 0.73±0.01        | 0.46±0.01        | <b>0.51±0.02</b> |
| +Global-Fixed | NMR <sub>1</sub>   | 0.79±0.20        | 0.54±0.20        | 0.44±0.16        | 0.41±0.19        | 0.56±0.08        | 0.63±0.10        | 0.29±0.10        | 0.36±0.12        |
|               | NMR <sub>10</sub>  | 0.84±0.05        | 0.63±0.08        | 0.62±0.08        | 0.62±0.09        | 0.63±0.01        | 0.71±0.02        | 0.33±0.03        | 0.41±0.07        |
|               | NMR <sub>100</sub> | 0.85±0.01        | <b>0.68±0.03</b> | <b>0.66±0.02</b> | 0.67±0.02        | <b>0.68±0.01</b> | <b>0.78±0.01</b> | 0.33±0.01        | 0.44±0.02        |

Table 3: **Ablations (3):** Understanding the effect of number of recordings used as non-matching references (NMR). MOS Correlations: Pearson (PC), Spearman (SC). Each cell shows the mean and standard deviation after 10 iterations. ↑ is better.

## 6 Speech enhancement

We use the VCTK dataset that consists of around 11,572 utterances for training and 824 files for validation. The dataset consists of 28 speakers equally split between male and female speakers, containing 10 unique background noise types across 4 different SNR conditions. Our denoising network is similar to Tan et al. and consists of a multi-layer convolutional encoder and decoder with U-Net skip connections, and a sequence modeling network applied on the encoders output. The input to the model are the real and imaginary components of the STFT of the signal, and the outputs are the complex ratio mask. The encoder (and decoder) consists of 5 gated convolutional layers with a filter size of  $2 \times 6$ , and use sigmoid activation for the gating mechanism. The sequence modeling network takes the encoders output and outputs a non-linear transformation of the same size. Since we design a *causal* model, the network consists of 2 uni-directional LSTM layers with 256 hidden units in each layer.



237 For evaluation, we use the audio clips from the VCTK test set and evaluate scores on that dataset.  
238 We evaluate the quality of enhanced speech using objective measures. We use: i) PESQ (from 0.5  
239 to 4.5); (ii) Short-Time Objective Intelligibility (*STOI*) (from 0 to 100); (iii) Segmental Signal-to-  
240 Noise Ratio (*SNRseg*): average of SNR values of short segments (15 to 20ms) ; (iv) *CSIG*: MOS  
241 prediction of the signal distortion attending only to the speech signal (from 1 to 5); (v) *CBAK*: MOS  
242 prediction of the intrusiveness of background noise (from 1 to 5); (vi) *COVL*: MOS prediction of the  
243 overall effect (from 1 to 5). We compare the baseline approach with our model across the various  
244 paired-data constrained strategies.

245 As shown in Table 4 (main paper), SE models trained using NORESQA obtain higher objective  
246 scores than the baseline models across all three strategies. We observe that the difference between  
247 the scores from our model and the baseline keeps increasing as we get more paired data which  
248 shows the usefulness of our metric, especially for sparse labeled-data situations (e.g., low-resource  
249 languages) since our approach leverages unlimited unpaired data.

250 Most notable is the improvement in *STOI* that shows our metrics’ utility as an optimization objective  
251 for pretraining. Given sparse-labeled data, the baseline model can fit the test set only as much.  
252 However, since our model can effectively leverage unlimited unpaired data during pretraining, given  
253 a model of sufficient capacity, it has the flexibility to learn a more complex mapping. This is  
254 precisely why we observe higher objective scores for quality and intelligibility than the baseline  
255 approaches which also highlights the usefulness of our framework.
